# Supplementary material for: Open-Bundle Structure as the Unfolding Intermediate of Cytochrome c’ Revealed by Small Angle Neutron Scattering
Source: Preprints.org preprint supplement (doi:10.20944/preprints202105.0739.v1), 2021-05-31
Supplement: Supplementary file 1 [file supplementary]

**Supplementary Material**

**Determination of the Open-Bundle Structure of Cytochrome *c*’ as a Folding/Unfolding Intermediate by Small-Angle Neutron Scattering**

Takahide Yamaguchi,1,2 Kouhei Akao,1 Alexandros Koutsioubas,3 Henrich Frielinghaus,3 and Takamitsu Kohzuma*1,2

1Institute of Quantum Beam Science, Graduate School of Science and Engineering, Ibaraki University, 2-1-1 Bunkyo, Mito, Ibaraki 310-8512, Japan

2Frontier Research Center of Applied Atomic Sciences, Ibaraki University, 162-1 Shirakata, Tokai, Ibaraki 319-1106, Japan

3Jülich Centre for Neutron Science at Heinz Maier-Leibnitz Zentrum, Forschungszentrum Jülich GmbH, Lichtenbergstrasse 1, Garching D-85747, German

**Table of Contents**

**Figure S1.** SDS-PAGE of purified Cyt *c*’ on a 12.5% gel…………….……… page 2

**Figure S2.** Electronic absorption spectra of Cyt *c*’ at pD 1.7, 6.4, 9.6, and ~13. The spectral patterns are annotated by charge-transfer 3 (CT3), Soret, CT2, Q, and CT 1 at short wavelengths. The samples were prepared by diluting the samples following SANS experiments…………………………………………………………………… page 2

**Figure S3.** Curves obtained by *ab initio* analyses (red lines) and data points used for each condition (squares: pD 6.4, circles: pD 9.6, triangles: pD ~13)…...………… page 3

**Figure S4.** The estimation of I(0) values by extrapolation of the I(*Q*)SANS curves (top panels) and Guinier plots (bottom panels) at pD 1.7 (A, red), 6.4 (B, orange), 9.6 (C, green), and ~13 (D, blue). The black solid lines in the top panels are fitted I(Q) SANS curves by Fourier transformation of *P*(*r*) at each pD value, and the black dashed lines in the bottom panels were obtained from linear Guinier fitting. The I(0) point at each pD value is marked by a diamond on the vertical axis.…...……………………… page 3


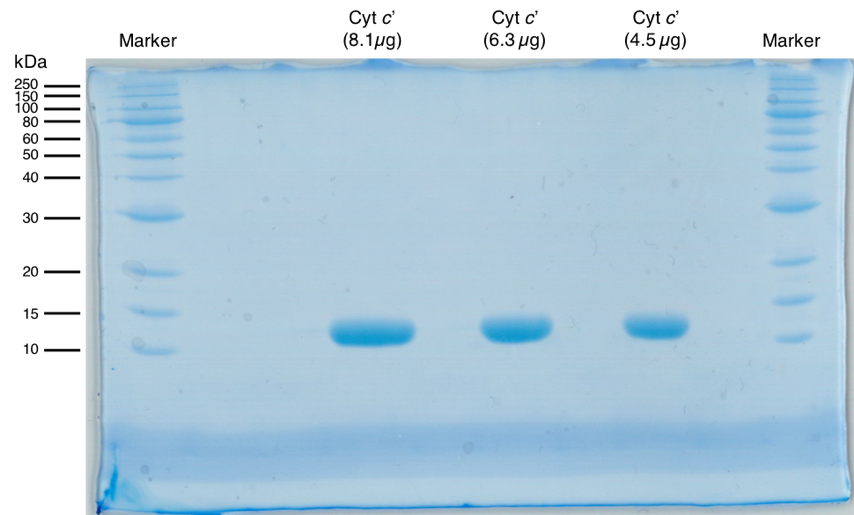


**Figure S1.** SDS-PAGE of purified Cyt *c*’ on a 12.5% gel.


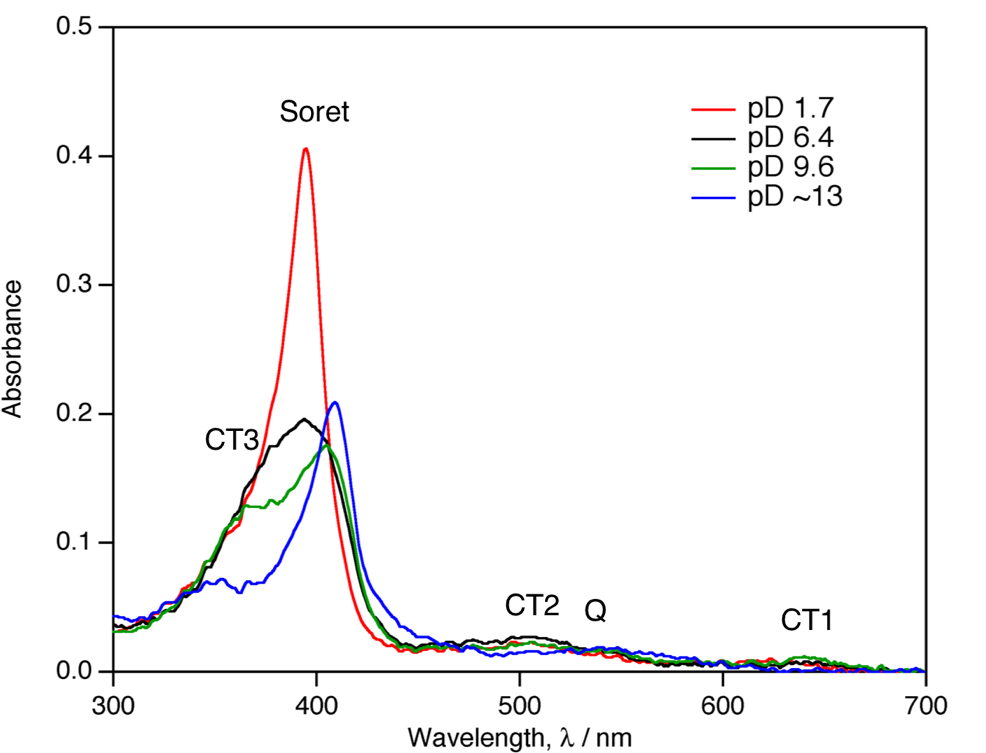


**Figure S2.** Electronic absorption spectra of Cyt c’ at pD 1.7, 6.4, 9.6, and ~13. The spectral patterns are annotated by charge-transfer 3 (CT3), Soret, CT2, Q and CT 1 at short wavelengths. The samples were prepared by diluting the samples following SANS experiments.


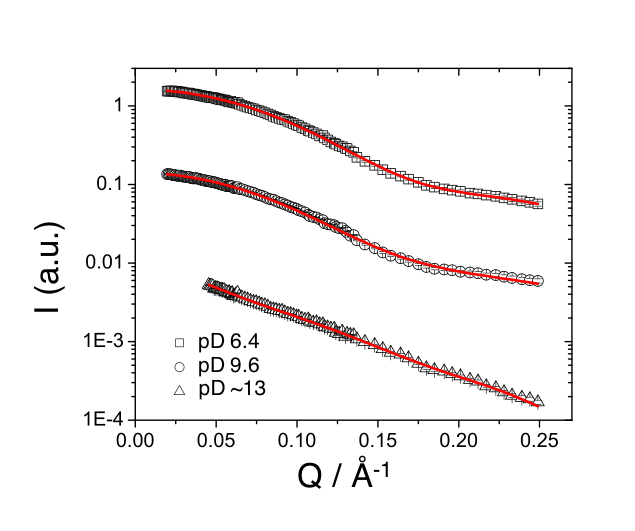


**Figure S3.** Curves obtained by ab initio analyses (red lines) and data points used for each condition (squares: pD 6.4, circles: pD 9.6, triangles: pD ~13).


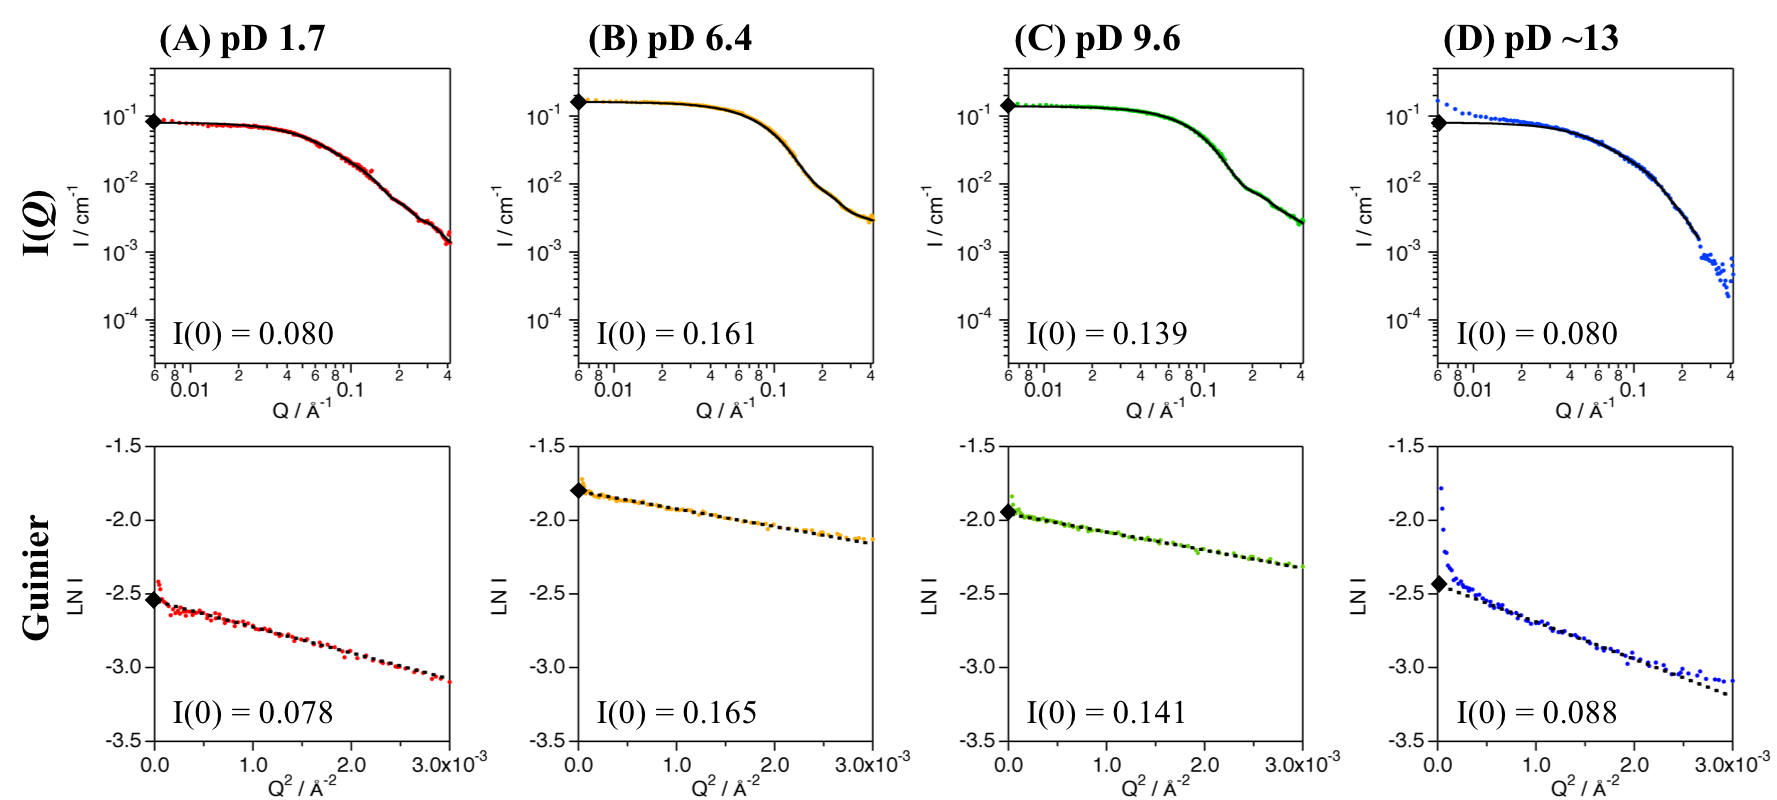


**Figure S4.** The estimation of I(0) values by extrapolation of the I(*Q*)SANS curves (top panels) and Guinier plots (bottom panels) at pD 1.7 (A, red), 6.4 (B, orange), 9.6 (C, green), and ~13 (D, blue). The black solid lines in the top panels are fitted I(Q) SANS curves by Fourier transformation of *P*(*r*) at each pD value, and the black dashed lines in the bottom panels were obtained from linear Guinier fitting. The I(0) point at each pD value is marked by a diamond on the vertical axis.
